# Supplementary material for: Short-Term Effects of a Ready-to-Drink Pre-Workout Beverage on Exercise Performance and Recovery
Source: Nutrients. 2017 Aug 1;9(8):823. doi: 10.3390/nu9080823 (PMC5579616; doi:10.3390/nu9080823)
Supplement: Supplementary file 1 [file nutrients-09-00823-s001.xlsx]

## Sheet: TABLE 1 Demographics
TABLE 1. Baseline Demographics
Measurement	Male (n=12)			Female (n=13)			Overall (n=25)
	Mean		SD	Mean		SD	Mean		SD	p-values
Age (yr)	23.3	±	3.62706	24.5	±	4	23.9	±	4	0.43
Height (cm)	177.3	±	7	166	±	5	171.4	±	8	0
Weight (kg)	81.7	±	13	65.1	±	8	73.1	±	13	0.001
Body Mass Index (kg/m2)	26	±	3.71177	23.7	±	2.85802	24.8	±	4	0.119
Body Fat (%)	17.2	±	6	28.4	±	6	23	±	8	0
Fat Free Mass (kg)	67.1	±	8.5297	47.8	±	8	57.1	±	13	0
Bench Press 1RM (kg)	88.3	±	27	37.9	±	10	62.1	±	32	0
Bench Press 1RM (kg/kgFFM)	1.31	±	0.362334	0.8	±	0.2	1.05	±	0.4	0
Leg Press 1RM (kg)	454.5	±	174.7	284.3	±	89	366	±	160	0.005
Leg Press 1RM (kg/kgFFM)	6.66	±	1.98	5.96	±	1.57	6.3	±	1.8	0.175
Mean data presented as means ± SD. One-way ANOVA p-values listed for each variable. PLA: placebo, RTD: ready-to-drink pre-workout supplement, 1RM: one repetition maximum, FFM: fat free mass, kg/kgFFM: weight relative to participant fat free mass

## Sheet: TABLE 2 Strength Performance
TABLE 2. Strength and Muscular Endurance Relative to Fat Free Mass
Variable	Treatment	Day 1 Pre-Ingestion			Day 1 Post Ingestion			Day 6 Pre-Ingestion			Day 6 Post Ingestion			Treatment
		Mean		SD	Mean		SD	Mean		SD	Mean		SD	Mean		SE	p-value
BP 1-RM (kg/kgFFM)	PLA	1.01507	±	0.378382	0.944291	±	0.363571	1.00733	±	0.363439	0.97477	±	0.371533	0.985	±	0.057	Time	0.001
	RTD	1.02947	±	0.366123	0.986969	±	0.351769	1.04483	±	0.348142	0.997957	±	0.355663	1.015	±	0.057	Trt	0.72
	Time	1.02227	±	0.368556	0.96563	±	0.35 *	1.02608	±	0.352732	0.986363	±	0.36 ‡				I	0.23
BP Repetitions to Failure @ 70% 1RM	PLA	9.964	±	3.233	9.6	±	3.65	10.132	±	3.37	12.272	±	3.22 *	10.492	±	0.707	Time	0.38
	RTD	10.28	±	4.37	12.32	±	5.28 *†	10.304	±	4.04	13.31	±	4.86 *	11.602	±	0.707	Trt	0.27
	Time	10.12	±	3.809	10.96	±	4.698	10.216	±	3.69	12.792	±	4.12				I	0.044
BP Lifting Volume	PLA	7.402	±	3.774	7.45862	±	4.56583	7.46425	±	3.72675	9.16968	±	4.44077	7.87	±	0.67	Time	0.36
(kg/kgFFM)	RTD	7.452	±	3.753	8.89044	±	4.06746	7.48122	±	3.16414	9.45337	±	3.53654	8.32	±	0.67	Trt	0.64
	Time	7.427	±	3.725	8.17453	±	4.34016	7.47274	±	3.42146	9.31153	±	3.97561				I	0.085
LP 1-RM (kg/kgFFM)	PLA	6.69504	±	1.65874	6.40969	±	1.58	6.79521	±	1.38385	6.38346	±	1.35	6.571	±	0.26	Time	0.663
	RTD	6.71668	±	1.41833	6.73979	±	1.41	6.82873	±	1.29302	6.6687	±	1.52	6.738	±	0.26	Trt	0.659
	Time	6.70586	±	1.52744	6.57474	±	1.49194	6.81197	±	1.32558	6.52608	±	1.42752				I	0.037
LP Repetitions to Failure @ 70% 1RM	PLA	21.16	±	10.831	18.56	±	8.4	20.76	±	10.68	20.88	±	10.971	20.34	±	1.808	Time	0.779
	RTD	22.44	±	15.086	26.44	±	13.0 †	19.75	±	9.307	25.12	±	14.086	23.88	±	1.8	Trt	0.173
	Time	21.8	±	13.013	22.5	±	11.634	20.265	±	9.941	23	±	12.678				I	0.11
LP Lifting Volume	PLA	94.2873	±	77.8979	81.1118	±	44.4	88.2911	±	49.7096	91.9308	±	57.8604	88.91	±	10.604	Time	0.75
(kg/kgFFM)	RTD	96.6446	±	66.7322	116.261	±	74.9 ‡	90.7019	±	47.5872	106.947	±	55.3848	102.639	±	10.604	Trt	0.37
	Time	95.4659	±	71.7962	98.6865	±	63.459	89.4965	±	48.1763	99.439	±	56.566				I	0.11
Combined Lifting	PLA	101.689	±	78.992	88.5705	±	46.8	95.7553	±	50.5391	101.1	±	60.2216	96.779	±	10.865	Time	0.76
Volume (kg/kgFFM)	RTD	104.096	±	66.4376	125.152	±	75.5 †	98.1832	±	48.8065	116.401	±	57.3487	110.958	±	10.865	Trt	0.361
	Time	102.893	±	72.2469	106.861	±	64.8668	96.9692	±	49.1861	108.75	±	58.7104				I	0.09
Values are means ± standard deviations. Multivariate analysis revealed overall Wilks’ Lambda treatment (p = 0.792), time (p = 0.010), and treatment x time (p = 0.010). Greenhouse-Geisser p-levels are reported with univariate analyses for time, treatment, and time x treatment interactions for each variable. * indicates a significant difference from initial measure, † indicates a significant betwee…

## Sheet: TABLE 3 Time Trial Performanc
TABLE 3. Time Trial Performance
Variable	Treatment	Day 2			Day 7			Treatment
		Mean		SD	Mean		SD	Mean		SE	p-values
Time (sec)	PLA	295.92	±	105.08	284.44	±	104.113	239.758	±	11.458	Time	0.695
	RTD	282.04	±	94.135	276.32	±	95.019	281.492	±	11.458	Trt	0.558
	Time	288.98	±	98.983	280.38	±	99				I	0.405
Power (W)	PLA	223.64	±	82.191	241.88	±	93.092	234.742	±	10.419	Time	0.12
	RTD	237.68	±	85.137	245.8	±	94.573	239.758	±	10.419	Trt	0.624
	Time	230.66	±	83.121	243.84	±	82				I	0.257
Power (W/kgFFM)	PLA	3.868	±	0.8899	4.157	±	0.94	4.013	±	0.174	Time	0.258
	RTD	4.17	±	0.873	4.293	±	0.982	4.232	±	0.174	Trt	0.378
	Time	4.02	±	0.885	4.22	±	0.954				I	0.245
Values are means ± standard deviations. Multivariate analysis revealed overall Wilks’ Lambda treatment (p = 0.62), time (p = 0.036), and treatment x time (p = 0.53). Greenhouse-Geisser p-levels are reported with univariate analyses for time, treatment, and time x treatment interactions for each variable. PLA=Placebo, RTD=Ready-to-drink Pre-workout supplement, FFM=Fat Free Mass, Trt=Treatment, I=T…

## Sheet: S1. Hemodynamic Response
Supplement Table S1. Hemodynamic Response to Postural Challenge.
Variable	Treatment	Day 1 Pre-Ingestion						Day 1 Post-Ingestion						Day 6 Pre-Ingestion						Day 6 Post-Ingestion						Treatment			p-value
		Supine			Standing			Supine			Standing			Supine			Standing			Supine			Standing
		Mean		SD	Mean		SD	Mean		SD	Mean		SD	Mean		SD	Mean		SD	Mean		SD	Mean		SD	Mean		SE
HR	PLA	61.52	±	9.786	70.64	±	12.257	65.04	±	8.002	71.36	±	14.139	58.96	±	7.855	67.72	±	10.114	68.08	±	7.842	77.12	±	15.243	67.92	±	1.395	Time	0.004
	RTD	60.4	±	8.04	68.56	±	10.93	66.64	±	11.686	68.88	±	12.235	60.58	±	7.21	67.75	±	9.497	65.92	±	10	69.28	±	12	66.025	±	1.424	Trt	0.347
	Time	60.96	±	8.88	69.6	±	11.542	65.84	±	9.945	70.12	±	13.2*	59.76	±	7.513	68.76	±	9.765	67	±	9	73.2	±	14.3*				I	0.185
SBP	PLA	114	±	8.062	114.8	±	9.849	115.52	±	7.795	114.64	±	9.827	112	±	4.619	113.92	±	7.291	114.04	±	5.42	113.2	±	7.394	114.19	±	0.76†	Time	<0.001
	RTD	115.68	±	6.473	116.08	±	7.405	117.92	±	7.756	117.8	±	7.24	116	±	5.564	116.67	±	5.799	115.92	±	8.86	115.84	±	8.678	116.82	±	0.77†	Trt	0.019
	Time	114.84	±	7.285	115.44	±	8.648	116.72	±	7.65*	116.22	±	8.688	113.96	±	5.44*	115.27	±	6.679	114.98	±	6.61*	114.52	±	8				I	0.841
DBP	PLA	73.04	±	7.441	72.64	±	8.995	73.04	±	6.883	73.52	±	7.901	73.04	±	6.76	75.92	±	7.405	74.8	±	7.55	75.2	±	7.853	74.002	±	0.781	Time	0.13
	RTD	74.8	±	7	74.64	±	6.048	75.6	±	4.69	75.36	±	5.908	72	±	7.824	72.88	±	7.663	75.2	±	6.455	75.6	±	6.88	74.576	±	0.797	Trt	0.623
	Time	73.92	±	7.205	73.64	±	7.653	74.32	±	5.971	74.44	±	6.967	72.53	±	7.243	74.43	±	7.61	75	±	6.955	75.4	±	7.309				I	0.18
MAP	PLA	86.69	±	6.6	72.64	±	8.995	73.04	±	6.883	73.52	±	7.9	73.04	±	6.761	75.92	±	7.405	74.8	±	7.55	75.2	±	7.853	75.738	±	0.752	Time	0.44
	RTD	88.43	±	5.665	74.64	±	6.04	75.6	±	4.69	75.36	±	5.908	72	±	7.824	72.88	±	7.663	75.2	±	6.45	75.6	±	6.88	76.264	±	0.767	Trt	0.627
	Time	87.56	±	6.152	73.64	±	7.65	74.32	±	5.971	74.44	±	6.967	72.53	±	7.243	74.43	±	7.61	75	±	6.955	75.4	±	7.309				I	0.176
RPP	PLA	70.15	±	12.451	80.93	±	14.93	75.16	±	70.739	82.06	±	19.263	80.928	±	14.9626	79.3832	±	12.2508	82.0592	±	19.2628	87.38	±	18.533	77.609	±	1.765	Time	0.001
	RTD	69.8	±	9.687	79.49	±	13.25	78.63	±	15.066	81.35	±	16.497	79.8517	±	13.4104	79.075	±	11.9842	82.285	±	16.1545	80.4	±	16.395	77.178	±	1.799	Trt	0.865
	Time	69.98	±	11.042	80.21	±	14.008	76.89	±	13.066	81.7	±	18	80.4008	±	14.1*	79.2322	±	11.9952	82.1698	±	17.6235	83.89	±	17.3 *				I	0.232
Values are means ± standard deviations. Multivariate analysis revealed overall Wilks’ Lambda treatment (p = 0.055), time (p < 0.001), and treatment x time (p = 0.47). Greenhouse-Geisser p-levels are reported with univariate analyses for time, treatment, and time x treatment interactions for each variable. * indicates significant change from baseline (p < 0.05). HR=Heart rate, SBP=Systolic blood p…

## Sheet: S2.  Liver, Kidney, Muscle
Supplemental TABLE S2. Liver, kidney, and muscle data.
	Variable	Treatment	Day 1			Day 2			Day 6			Day 7			Treatment
			Mean		SD	Mean		SD	Mean		SD	Mean		SD	Mean		SE	p-value
Liver	AST	PLA	26.4394	±	8.28953	24.0626	±	5.16642	25.1247	±	8.09018	25.6294	±	6.56139	25.362	±	0.994154	Time	0.19
	2-50 U/L	RTD	23.5073	±	6.1663	29.0008	±	21.3729	25.9745	±	6.9051	25.624	±	6.26588	26.289	±	1.01099	Trt	0.774
		Time	25.0669	±	7.44294	26.3741	±	15.1218	25.5225	±	7.48994	25.6269	±	6.35495				I	0.153
	ALP	PLA	67.0503	±	28.7394	63.4927	±	22.1541	69.0714	±	18.0376	65.6271	±	23.1235	66.681	±	2.22382	Time	0.049
	7-60 U/L	RTD	71.8883	±	26.3248	68.2194	±	23.2201	66.2294	±	28.5438	68.6005	±	20.6655	67.259	±	2.26148	Trt	0.706
		Time	69.3149	±	27.4455	65.7052	±	22.5367	67.7411	±	23.3*	67.0189	±	21.8				I	0.585
	ALT	PLA	20.4602	±	8.24916	18.4268	±	6.29343	24.1401	±	16.5939	19.7167	±	6.95809	20.819	±	0.906134	Time	0.017
	44-147 U/L	RTD	19.9707	±	6.35543	20.3552	±	7.32358	20.2356	±	7.17877	20.7086	±	6.73432	20.347	±	0.921482	Trt	0.776
		Time	20.2311	±	7.34875	19.3295	±	6.78941	22.3125	±	13.1*	20.181	±	6.8*				I	0.119
Muscle	CK	PLA	212.111	±	170.914	210.285	±	134.674	207.773	±	211.156	227.719	±	224.713	218.171	±	33.1078	Time	0.191
	0-200 U/L	RTD	163.409	±	104.995	447.32	±	836.77	215.527	±	202.477	288.406	±	281.098	277.511	±	33.6686	Trt	0.336
		Time	189.314	±	144.489	321.237	±	586.008	211.403	±	204.924	256.126	±	251.705				I	0.157
	LDH	PLA	190.443	±	55.8166	171.06	±	35.5046	179.987	±	43.5959	188.971	±	64.0813	182.109	±	4.89454	Time	0.27
	140-280 U/L	RTD	169.747	±	39.1894	170.055	±	39.4916	195.486	±	57.5741	178.964	±	37.573	182.817	±	4.97744	Trt	0.688
		Time	180.755	±	49.3515	170.59	±	37.0126	187.242	±	50.6557	184.287	±	53.0324				I	0.114
Kidney	BUN	PLA	5.2716	±	1.5661	4.58228	±	1.25731	5.59864	±	1.52132	4.92656	±	1.52229	5.117	±	0.145897	Time	0.68
	2.1-7.1 mmol/L	RTD	5.40173	±	1.65025	4.75568	±	1.23652	5.14414	±	1.63743	5.38114	±	1.76018	5.116	±	0.148368	Trt	0.874
		Time	5.33251	±	1.58972	4.66345	±	1.23711	5.38589	±	1.5761	5.13934	±	1.63586				I	0.211
	Creatinine	PLA	90.0303	±	19.4002	83.8554	±	19.1513	89.8389	±	19.4114	82.3867	±	17.2209	86.896	±	1.68937	Time	0.59
	80-115 µmol/L	RTD	84.0948	±	14.2088	84.4515	±	14.5833	86.2911	±	20.1498	86.3261	±	22.3938	84.973	±	1.71798	Trt	0.672
		Time	87.252	±	17.2481	84.1344	±	16.9864	88.1782	±	19.6252	84.2307	±	19.6879				I	0.242
Values are means ± standard deviations with normal clinical values shown for each variable. Multivariate nalysis revealed overall Wilks’ Lambda treatment (p = 0.92), time (p = 0.43), and treatment x time (p = 0.21). Greenhouse-Geisser p-levels are reported with univariate analyses for time, treatment, and time x treatment interactions for each variable. * indicates significant difference from pri…

## Sheet: S3. Lipid, Macro, Nitrate
Supplemental TABLE S3. Blood Lipids, Macronutrients, and Nitrate data.
Variable	Treatment	Day 1			Day 2			Day 6			Day 7			Treatment
		Mean		SD	Mean		SD	Mean		SD	Mean		SD	Mean		SE	p-value
Glucose	PLA	5.4344	±	0.899565	5.25	±	0.76	5.6204	±	1.0925	5.2188	±	0.832162	5.381	±	0.119	Time	0.23
4-6 mmol/L	RTD	5.13455	±	0.549656	5.15864	±	0.779892	5.16273	±	0.914274	5.3	±	0.931839	5.189	±	0.111	Trt	0.244
	Time	5.29404	±	0.763543	5.207	±	0.76	5.40617	±	1.0284	5.25681	±	0.871428				I	0.3297
Triglycerides	PLA	1.26832	±	0.662383	1.03064	±	0.473279	1.36348	±	1.22762	1.23364	±	0.888738	1.222	±	0.125	Time	0.3
1.7-2.2 mmol/L	RTD	2.97045	±	0.86	1.192	±	0.646844	1.15959	±	0.651286	1.10045	±	0.589683	1.154	±	0.133	Trt	0.714
	Time	1.214	±	0.644	1.10617	±	0.560804	1.26804	±	0.995243	1.1713	±	0.758522				I	0.246
HDL	PLA	1.68488	±	0.617589	1.58444	±	0.496426	2.14712	±	2.8791	1.61928	±	0.594916	1.746	±	0.110097	Time	0.74
1-1.55 mmol/L	RTD	1.55064	±	0.493416	1.62618	±	0.508292	1.68495	±	0.547256	1.64714	±	0.472024	1.613	±	0.111962	Trt	0.488
	Time	1.62204	±	0.561007	1.60398	±	0.496958	1.93079	±	2.12506	1.63232	±	0.535322				I	0.488
Cholesterol	PLA	4.91696	±	1.46656	4.36224	±	1.02166	4.7982	±	1.33017	4.58044	±	1.23545	4.661	±	0.115602	Time	0.893
5.18-6.18 mmol/L	RTD	4.62605	±	1.1033	4.49809	±	1.01189	4.60077	±	1.0742	4.56159	±	1.08394	4.542	±	0.11756	Trt	0.802
	Time	4.78079	±	1.3036	4.42583	±	1.00833	4.70579	±	1.20824	4.57162	±	1.15448				I	0.465
LDL	PLA	2.5732	±	0.960925	2.27532	±	0.730311	2.56084	±	0.75	2.42484	±	0.686815	2.467	±	0.0824654	Time	0.246
2.59-4.12 mmol/L	RTD	2.62495	±	1.13289	2.40009	±	0.829324	2.37095	±	0.807909	2.45359	±	0.966513	2.447	±	0.0838622	Trt	0.937
	Time	2.59743	±	1.03361	2.33372	±	0.772151	2.47196	±	0.774291	2.4383	±	0.820232				I	0.418
Nitrates	PLA	0.1768	±	0.1005	0.1812	±	0.126	0.1973	±	0.153	0.1916	±	0.183	0.187	±	0.016	Time	0.287
mmol/L	RTD	0.163	±	0.0587	0.2005	±	0.066	0.228	±	0.1456	0.2268	±	0.11067	0.212	±	0.016	Trt	0.262
	Time	0.17	±	0.0818	0.1909	±	0.1	0.228	±	0.14561	0.2092	±	0.15046				I	0.343
Values are means ± standard deviations with normal clinical values are included with each variable. Multivariate analysis revealed overall Wilks’ Lambda treatment (p = 0.82), time (p = 0.44), and treatment x time (p = 0.30). Greenhouse-Geisser p-levels are reported with univariate analyses for time, treatment, and time x treatment interactions for each variable. HDL=high densilty lipoprotein, LDL…

## Sheet: S4.  Whole Blood Counts
Supplemental TABLE S4. Whole Blood Chemistry
Variable	Treatment	Day 1			Day 2			Day 6			Day 7			Treatment
		Mean		SD	Mean		SD	Mean		SD	Mean		SD	Mean		SE	p-value
WBC	PLA	6.602	±	1.44817	6.038	±	1.34391	6.406	±	1.74268	5.722	±	1.48899	6.187	±	0.149324	Time	0.002
(x103/µl)	RTD	6.658	±	1.59	6.144	±	1.53	6.22	±	1.36	5.87	±	1.36	6.252	±	0.151853	Trt	0.925
	Time	6.63	±	1.51	6.09	±	1.43*	6.31	±	1.55	5.79	±	1.41*				I	0.781
LYM	PLA	2.5032	±	0.64978	2.326	±	0.721561	2.6152	±	0.785245	2.44	±	0.831665	2.466	±	0.118466	Time	0.127
(%)	RTD	2.589	±	0.738	2.4	±	1	2.61	±	0.799	2.52	±	0.854	2.53	±	0.14	Trt	0.413
	Time	2.545	±	0.689	2.36	±	0.865	2.615	±	0.7845	2.48	±	0.84				I	0.916
MID	PLA	0.7736	±	0.227704	0.6648	±	0.219699	0.5832	±	0.247348	0.6816	±	0.339506	0.67	±	0.0436124	Time	0.768
(%)	RTD	0.804	±	0.64	0.817	±	0.64	0.787273	±	0.53585	0.8	±	0.515	0.827	±	0.0443511	Trt	0.205
	Time	0.827	±	0.477	0.748	±	0.5134	0.678723	±	0.416651	0.741	±	0.436				I	0.905
GRAN	PLA	3.328	±	1.08686	3.0492	±	0.823569	3.2112	±	0.93062	2.604	±	1.09762	3.057	±	0.108027	Time	0.012
(x103/µl)	RTD	3.184	±	1.427	2.938	±	1.044	2.866	±	1.077	2.564	±	1.1	2.884	±	0.109857	Trt	0.466
	Time	3.256	±	1.258	2.99574	±	0.95*	3.039	±	1.041	2.584	±	1.09*				I	0.771
RBC	PLA	4.6892	±	0.417212	4.6624	±	0.387387	4.7316	±	0.56583	4.7316	±	0.431023	4.719	±	0.0350881	Time	0.56
(x106/µl)	RTD	4.829	±	0.533	4.848	±	0.58	4.798	±	0.483	4.837	±	0.535	4.805	±	0.0356824	Trt	0.059
	Time	4.759	±	0.479	4.755	±	0.497	4.765	±	0.552	4.784	±	0.439				I	0.501
HGB	PLA	13.9208	±	1.30503	13.91	±	1.13578	14.2788	±	1.43569	14.0272	±	1.2354	14.075	±	0.117431	Time	0.762
(g/dl)	RTD	14.1	±	1.55	14.416	±	1.83	14.12	±	1.43	14.3	±	1.7736	14.206	±	0.11942	Trt	0.324
	Time	14.16	±	1.529	14.16	±	1.53	14.2	±	1.42	14.16	±	1.497				I	0.158
HCT	PLA	43.966	±	3.71501	43.5032	±	3.23261	45.1708	±	4.6	44.1432	±	3.76517	44.308	±	0.337461	Time	0.627
(%)	RTD	45.1	±	4.689	45.38	±	4.87	44.95	±	4.24	44.9	±	4.57	44.893	±	0.343177	Trt	0.21
	Time	44.5474	±	4.35135	44.44	±	4.2	45.06	±	4.4	44.52	±	4.16				I	0.195
MCV	PLA	93.894	±	3.47788	93.46	±	3.81215	93.9468	±	3.25062	92.3608	±	5.54399	93.352	±	0.374784	Time	0.091
(fL)	RTD	93.54	±	3.29	93.78	±	3.74	93.82	±	3.43	92.47	±	4.75	93.46	±	0.381132	Trt	0.993
	Time	93.72	±	3.35	93.62	±	3.43	93.88	±	3.31	92.41	±	5.11				I	0.844
MCH	PLA	29.7212	±	1.32479	29.86	±	1.32162	29.7032	±	1.09495	29.6952	±	1.29172	29.739	±	0.135363	Time	0.892
(pg/cell)	RTD	29.61	±	1.37	29.75	±	1.58	29.46	±	1.38	29.58	±	1.42	29.58	±	0.137656	Trt	0.676
	Time	29.66	±	1.33	29.81	±	1.44	29.58	±	1.24	29.64	±	1.34				I	0.929
MCHC	PLA	31.6544	±	0.823352	31.9728	±	0.751468	31.64	±	0.960577	31.782	±	0.7612	31.774	±	0.0969474	Time	0.794
(g/dl)	RTD	31.67	±	1.098	31.73	±	1.32	31.4	±	1.075	31.82	±	1.08	31.614	±	0.0985895	Trt	0.542
	Time	31.66	±	0.96	31.86	±	1.07	31.52	±	1.01	31.79	±	0.927				I	0.716
RDW	PLA	13.1428	±	0.885558	13.0388	±	0.631112	13.2892	±	0.854668	13.0904	±	0.716138	13.145	±	0.0837437	Time	0.658
(%)	RTD	13.32	±	0.856	13.52	±	1.059	13.2	±	0.85	13.42	±	0.76	13.368	±	0.0851621	Trt	0.199
	Time	13.23	±	0.867	13.28	±	0.897	13.24	±	0.845	13.25	±	0.75				I	0.124
Values are means ± standard deviations. Multivariate analysis revealed overall Wilks’ Lambda treatment (p = 0.61), time (p = 0.052), and treatment x time (p = 0.99). Greenhouse-Geisser p-levels are reported with univariate analyses for time, treatment, and time x treatment interactions for each variable. * represents p<0.05 change from baseline. PLA=Placebo, RTD=Ready-to-drink Pre-workout supplem…

## Sheet: S5. Blood Chemistry CHI
Supplemental Table S5. Change in blood markers relative to normal clinical limits from Day 1 to Day 7
		Change
		No Change	Normal to High	High to Normal	High to High
Marker	Treatment					Overall (N)	p-value
AST	PLA	24	0	0	1	25	Trt	0.312
2-50U/L	RTD	25	0	0	0	25
	Time	49	0	0	1	50
ALP	PLA	23	0	2	0	25	Trt	0.513
7-60U/L	RTD	23	0	1	1	25
	Time	46	0	3	1	50
ALT	PLA	22	0	1	2	25	Trt	0.492
44-147-U/L	RTD	24	0	0	1	25
	Time	46	0	1	3	50
CK	PLA	11	8	3	3	25	Trt	0.618
0-200 U/L	RTD	13	4	4	4	25
	Time	24	12	7	7	50
LDH	PLA	2	16	4	3	25	Trt	0.641
140-280-U/L	RTD	2	12	5	6	25
	Time	4	28	9	9	50
BUN	PLA	24	0	0	1	25	Trt	0.6
2.1-7.1-mmol/L	RTD	23	0	1	1	25
	Time	47	0	1	2	50
Creatinine	PLA	18	1	4	2	25	Trt	0.103
80-115-umol/L	RTD	24	0	0	1	25
	Time	42	1	4	3	50
Glucose	PLA	25	0	0	0	25	Trt	1
4.0-6.0-mmol/L	RTD	25	0	0	0	25
	Time	50	0	0	0	50
Triglycerides	PLA	25	0	0	0	25	Trt	1
1.7-2.2-mmol/L	RTD	25	0	0	0	25
	Time	50	0	0	0	50
HDL	PLA	6	13	5	1	25	Trt	0.09
1.0-1.55-mmol/L	RTD	7	11	1	6	25
	Time	13	24	6	7	50
Cholesterol	PLA	16	5	2	2	25	Trt	0.373
5.18-6.18-mmol/L	RTD	19	1	2	3	25
	Time	35	6	4	5	50
LDL	PLA	22	0	2	1	25	Trt	0.837
2.59-4.12-mmol/L	RTD	23	0	1	1	25
	Time	45	0	3	2	50
Data are presented as number of occurrences and were analyzed by Pearson's Chi Square on a marker-by-marker basis. Pearson's Chi Square p-values listed for each variable with significance determined at p < 0.05. Data were arranged so that values within normal clinical ranges were labelled 'Normal' and values above normal clinical ranges were labelled 'High'. They were then assessed as 'Normal/Nor…

## Sheet: S6. Side Effects Freq
Supplemental TABLE S6. Frequency of Self-Reported Side Effects
		Day 1				Day 2				Day 6				Day 7
Variable & no. of occurrences		Pre-Ingestion		Post-Ingestion		Pre-Ingestion		Post-Ingestion		Pre-Ingestion		Post-Ingestion		Pre-Ingestion		Post-Ingestion
		PLA	RTD	PLA	RTD	PLA	RTD	PLA	RTD	PLA	RTD	PLA	RTD	PLA	RTD	PLA	RTD	p-value
Dizziness	0	22	22	19	18	22	22	20	18	21	19	20	19	22	21	19	16	Trt	0.493
	1	0	0	3	4	0	0	1	3	1	2	1	2	0	1	3	4
	2	0	0	0	0	0	0	1	1	0	1	1	0	0	0	0	2
	3	0	0	0	0	0	0	0	0	0	0	0	1	0	0	0	0
	4	0	0	0	0	0	0	0	0	0	0	0	0	0	0	0	0
Headache	0	20	20	21	21	21	21	21	21	21	20	20	19	21	20	18	18	Trt	0.849
	1	2	2	1	1	1	1	1	1	1	1	1	1	1	1	3	2
	2	0	0	0	0	0	0	0	0	0	0	1	0	0	0	1	1
	3	0	0	0	0	0	0	0	0	0	1	0	1	0	1	0	1
	4	0	0	0	0	0	0	0	0	0	0	0	0	0	0	0	0
Tachycardia	0	21	21	18	16	22	21	18	15	21	20	17	16	21	19	17	16	Trt	0.887
	1	1	1	2	3	0	1	1	3	1	2	2	3	0	3	2	2
	2	0	0	1	1	0	0	2	2	0	0	3	2	1	0	3	3
	3	0	0	1	1	0	0	1	0	0	0	0	1	0	0	0	1
	4	0	0	0	1	0	0	0	2	0	0	0	0	0	0	0	0
Palpitations	0	21	22	20	20	21	21	19	20	21	21	20	19	22	21	20	20	Trt	0.244
	1	1	0	2	1	1	1	2	0	1	0	2	1	0	0	2	0
	2	0	0	0	0	0	0	0	1	0	1	0	2	0	1	0	0
	3	0	0	0	1	0	0	1	0	0	0	0	0	0	0	0	2
	4	0	0	0	0	0	0	0	1	0	0	0	0	0	0	0	0
Dyspnea	0	20	20	18	17	21	21	17	14	20	20	17	16	21	19	18	13	Trt	0.564
	1	2	2	1	2	1	1	2	5	2	2	3	3	1	3	2	5
	2	0	0	2	2	0	0	1	1	0	0	1	3	0	0	1	3
	3	0	0	1	1	0	0	2	2	0	0	1	0	0	0	1	1
	4	0	0	0	0	0	0	0	0	0	0	0	0	0	0	0	0
Nervous	0	19	20	19	21	19	20	19	20	21	20	20	21	21	20	20	20	Trt	0.919
	1	1	2	1	1	2	2	2	2	1	2	2	1	1	2	2	2
	2	1	0	1	0	0	0	0	0	0	0	0	0	0	0	0	0
	3	1	0	1	0	1	0	1	0	0	0	0	0	0	0	0	0
	4	0	0	0	0	0	0	0	0	0	0	0	0	0	0	0	0
Blurred	0	22	21	20	20	21	22	21	20	22	21	21	21	22	22	21	21	Trt	0.538
Vision	1	0	1	2	1	1	0	1	2	0	1	1	0	0	0	1	0
	2	0	0	0	1	0	0	0	0	0	0	0	1	0	0	0	1
	3	0	0	0	0	0	0	0	0	0	0	0	0	0	0	0	0
	4	0	0	0	0	0	0	0	0	0	0	0	0	0	0	0	0
Other	0	22	22	22	19	22	20	22	19	22	20	22	19	22	21	22	20	Trt	0.538
Side Effects	1	0	0	0	3	0	1	0	3	0	0	0	2	0	0	0	1
	2	0	0	0	0	0	1	0	0	0	0	0	0	0	0	0	0
	3	0	0	0	0	0	0	0	0	0	1	0	0	0	0	0	0
	4	0	0	0	0	0	0	0	0	0	0	0	1	0	0	0	1
	5	0	0	0	0	0	0	0	0	0	1	0	0	0	1	0	0
Data are presented as number of occurrences and were anaylyzed by Pearson's Chi Square on a question-by-question basis. Pearson's Chi Square p-values listed for each variable with significance determined at p < 0.05. Values are as follows: 0=No occurrences, 1=1- to 2-occurrences/wk, 2=3- to 4- occurrences/wk, 3=5- to 6-occurrences/wk, 4=7 occurrences/wk, 5=More than 7 occurrences/wk. No significa…

## Sheet: S7. Side Effects Sev
Supplemental Table S7. Severity of Self-Reported Side Effects
		Day 1						Day 2						Day 6						Day 7
Variable	Treatment	Pre-Ingestion			Post-Ingestion			Pre-Ingestion			Post-Ingestion			Pre-Ingestion			Post-Ingestion			Pre-Ingestion			Post-Ingestion
		Mean		SD	Mean		SD	Mean		SD	Mean		SD	Mean		SD	Mean		SD	Mean		SD	Mean		SD	p-value
Dizziness	PLA	0	±	0	0.1818	±	0.394	0	±	0	0.136	±	0.467	0.1818	±	0.664	0.0909	±	0.29424	0	±	0	0.2273	±	0.68534	Time	0.03
	RTD	0	±	0	0.318	±	0.716	0	±	0	0.4545	±	1.056	0.272	±	0.702	0.318	±	0.893	0.136	±	0.639	0.5909	±	1.007	Trt	0.14
	Time	0	±	0	0.4998	±	1.1 *	0	±	0.0 *	0.5905	±	1.5 *	0.4538	±	1.366	0.4089	±	1.18724	0.136	±	0.6 ‡	0.8182	±	1.7 *	I	0.58
Headache	PLA	0.136	±	0.468	0.0456	±	0.213	0.046	±	0.213	0.182	±	0.665	0.046	±	0.213	0.091	±	0.294	0.046	±	0.213	0.318	±	0.779	Time	0.46
	RTD	0.0909	±	0.294	0.0455	±	0.213	0	±	0	0	±	0	0.1364	±	0.639	0.3636	±	1.05	0.1364	±	0.467	0.409	±	0.908	Trt	0.74
	Time	0.0909	±	0.294	0.0455	±	0.213	0	±	0	0	±	0	0.1364	±	0.639	0.3636	±	1.05	0.1364	±	0.467	0.409	±	0.908	I	0.41
Tachycardia	PLA	0	±	0	0.4545	±	0.963	0	±	0	0.546	±	1.011	0.046	±	0.213	0.273	±	0.703	0	±	0	0.18	±	0.646	Time	0.29
	RTD	0.046	±	0.213	0.591	±	1.05	0	±	0	0.955	±	1.527	0.227	±	1.066	0.5909	±	1.22	0.273	±	1.077	0.636	±	1.293	Trt	0.26
	Time	0.046	±	0.213	0.591	±	1.05	0	±	0	0.955	±	1.527	0.227	±	1.066	0.5909	±	1.22	0.273	±	1.077	0.636	±	1.293	I	0.64
Palpitations	PLA	0.046	±	0.213	0.091	±	0.294	0.046	±	0.213	0.091	±	0.294	0.046	±	0.213	0.091	±	0.294	0	±	0	0.364	±	1.497	Time	0.34
	RTD	0	±	0	0.182	±	0.665	0.046	±	0.213	0.364	±	1.177	0.182	±	0.853	0.273	±	0.935	0.227	±	0.869	0.318	±	1.041	Trt	0.53
	Time	0	±	0	0.182	±	0.665	0.046	±	0.213	0.364	±	1.177	0.182	±	0.853	0.273	±	0.935	0.227	±	0.869	0.318	±	1.041	I	0.54
Dyspnea	PLA	0.046	±	0.213	0.409	±	0.959	0.046	±	0.213	0.636	±	1.093	0.091	±	0.294	0.273	±	0.703	0	±	0	0.318	±	0.779	Time	0.06
	RTD	0.091	±	0.294	0.409	±	0.854	0	±	0	0.818	±	1.332	0.182	±	0.853	0.546	±	1.057	0.227	±	0.869	0.956	±	1.463	Trt	0.3
	Time	0.091	±	0.294	0.409	±	0.854	0	±	0	0.818	±	1.332	0.182	±	0.853	0.546	±	1.057	0.227	±	0.869	0.956	±	1.463	I	0.24
Nervous	PLA	0.182	±	0.501	0.046	±	0.213	0.182	±	0.501	0.091	±	0.294	0.046	±	0.213	0.091	±	0.294	0.046	±	0.213	0.091	±	0.294	Time	0.57
	RTD	0.091	±	0.294	0.046	±	0.213	0.046	±	0.213	0.046	±	0.213	0	±	0	0.046	±	0.213	0.091	±	0.294	0.091	±	0.294	Trt	0.5
	Time	0.091	±	0.294	0.046	±	0.213	0.046	±	0.213	0.046	±	0.213	0	±	0	0.046	±	0.213	0.091	±	0.294	0.091	±	0.294	I	0.45
Blurry Vision	PLA	0	±	0	0.091	±	0.294	0.046	±	0.213	0.046	±	0.213	0	±	0	0	±	0	0	±	0	0.046	±	0.213	Time	0.33
	RTD	0.046	±	0.213	0.091	±	0.426	0	±	0	0.182	±	0.665	0.136	±	0.639	0.227	±	0.752	0.136	±	0.639	0.136	±	0.639	Trt	0.27
	Time	0.046	±	0.213	0.091	±	0.426	0	±	0	0.182	±	0.665	0.136	±	0.639	0.227	±	0.752	0.136	±	0.639	0.136	±	0.639	I	0.51
Other side effects	PLA	0	±	0	0	±	0	0	±	0	0	±	0	0	±	0	0	±	0	0	±	0	0	±	0	Time	0.17
	RTD	0	±	0	0.318	±	0.894	0.318	±	1.041	0.455	±	0.912	0.273	±	0.9	0.364	±	0.902	0.136	±	0.639	0.409	±	1.054	Trt	0.06
	Time	0	±	0	0.318	±	0.894	0.318	±	1.041	0.455	±	0.912	0.273	±	0.9	0.364	±	0.902	0.136	±	0.639	0.409	±	1.054	I	0.19
Mean Data presented as Mean ± SD. Multivariate Wilk's Lambda analysis revealed no time (p = 0.12), treatment (p = ), or time x treatment interaction effect (p = 0.42). Greenhouse-Geisser p-values are listed for each variable to show time, treatment, and interaction effects with significance determined at p < 0.05. A score of 0 means no severity and a score of 4 equals maximum severity. * indicate…
